# Supplementary material for: A univariate ternary logic and three-valued multiplier implemented in a nano-columnar crystalline zinc oxide memristor
Source: Royal Society of Chemistry journal article supplement (doi:10.1039/c9ra04119b), 2019-01-01
Supplement: c9ra04119b1.pdf [file c9ra04119b1.pdf]

**Table S1** Truth table for 17 two-step ternary logics

| Logic Function | Initial State                                                                         | Writing        |                | Logic Output |
|----------------|---------------------------------------------------------------------------------------|----------------|----------------|--------------|
|                |                                                                                       | T <sub>1</sub> | T <sub>2</sub> |              |
| $F_0$          | 0    | 0              | $q(0, 1, 2)$   | 0, 0, 0      |
| $F_1$          | 0    | $q(0, 1, 2)$   | $V_1$          | 0, 0, 1      |
| $F_2$          | 0    | $q(0, 1, 2)$   | $V_{base}$     | 0, 0, 2      |
| $F_5$          | 0    | $q(0, 1, 2)$   | 0              | 0, 1, 2      |
| $F_9$          | 0    | $V_{th1}$      | $q(0, 1, 2)$   | 1, 0, 0      |
| $F_{18}$       | 0    | $V_{th2}$      | $q(0, 1, 2)$   | 2, 0, 0      |
| $F_4$          | 1    | $q(0, 1, 2)$   | $V_2$          | 0, 1, 1      |
| $F_{12}$       | 1    | 0              | $q(0, 1, 2)$   | 1, 1, 0      |
| $F_{13}$       | 1    | $q(0, 1, 2)$   | $V_1$          | 1, 1, 1      |
| $F_{14}$       | 1    | $q(0, 1, 2)$   | 0              | 1, 1, 2      |
| $F_{22}$       | 1    | $V_2$          | $q(0, 1, 2)$   | 2, 1, 1      |
| $F_{21}$       | 2    | 0              | $q(0, 1, 2)$   | 2, 1, 0      |
| $F_8$          | 2    | $q(0, 1, 2)$   | $V_{th2}$      | 0, 2, 2      |
| $F_{17}$       | 2   | $q(0, 1, 2)$   | $V_1$          | 1, 2, 2      |
| $F_{24}$       | 2  | $V_{base}$     | $q(0, 1, 2)$   | 2, 2, 0      |
| $F_{25}$       | 2  | $V_1$          | $q(0, 1, 2)$   | 2, 2, 1      |
| $F_{26}$       | 2  | $q(0, 1, 2)$   | 0              | 2, 2, 2      |

**Table S2** Truth table for 10 three-step ternary logics

| Logic Function | Initial State                                                                         | Writing        |                | Writing        |                | Logic Output |
|----------------|---------------------------------------------------------------------------------------|----------------|----------------|----------------|----------------|--------------|
|                |                                                                                       | T <sub>1</sub> | T <sub>2</sub> | T <sub>1</sub> | T <sub>2</sub> |              |
| $F_3$          | 0  | $q$            | 0              | 0              | $q$            | 0, 1, 0      |
| $F_{10}$       | 0  | $V_{th1}$      | $q$            | $q$            | $V_1$          | 1, 0, 1      |
| $F_{11}$       | 0  | $V_{th1}$      | $q$            | $q$            | $V_{base}$     | 1, 0, 2      |
| $F_{19}$       | 0  | $q$            | $V_1$          | $V_{th2}$      | $q$            | 2, 0, 1      |
| $F_{20}$       | 0  | $V_{th2}$      | $q$            | $q$            | $V_{base}$     | 2, 0, 2      |
| $F_{23}$       | 0  | $V_{th2}$      | $q$            | $q$            | 0              | 2, 1, 2      |
| $F_6$          | 2  | $q$            | $V_{th2}$      | $V_{base}$     | $q$            | 0, 2, 0      |
| $F_7$          | 2  | $V_1$          | $q$            | $q$            | $V_{th2}$      | 0, 2, 1      |
| $F_{15}$       | 2  | $q$            | $V_1$          | $V_{base}$     | $q$            | 1, 2, 0      |
| $F_{16}$       | 2  | $q$            | $V_1$          | $V_1$          | $q$            | 1, 2, 1      |
